# Supplementary material
Source: Springer Nature journal article supplement (https://www.springermedizin.de/resource/supplementary/12974_2004_21_MOESM6_ESM.pdf/9600010)

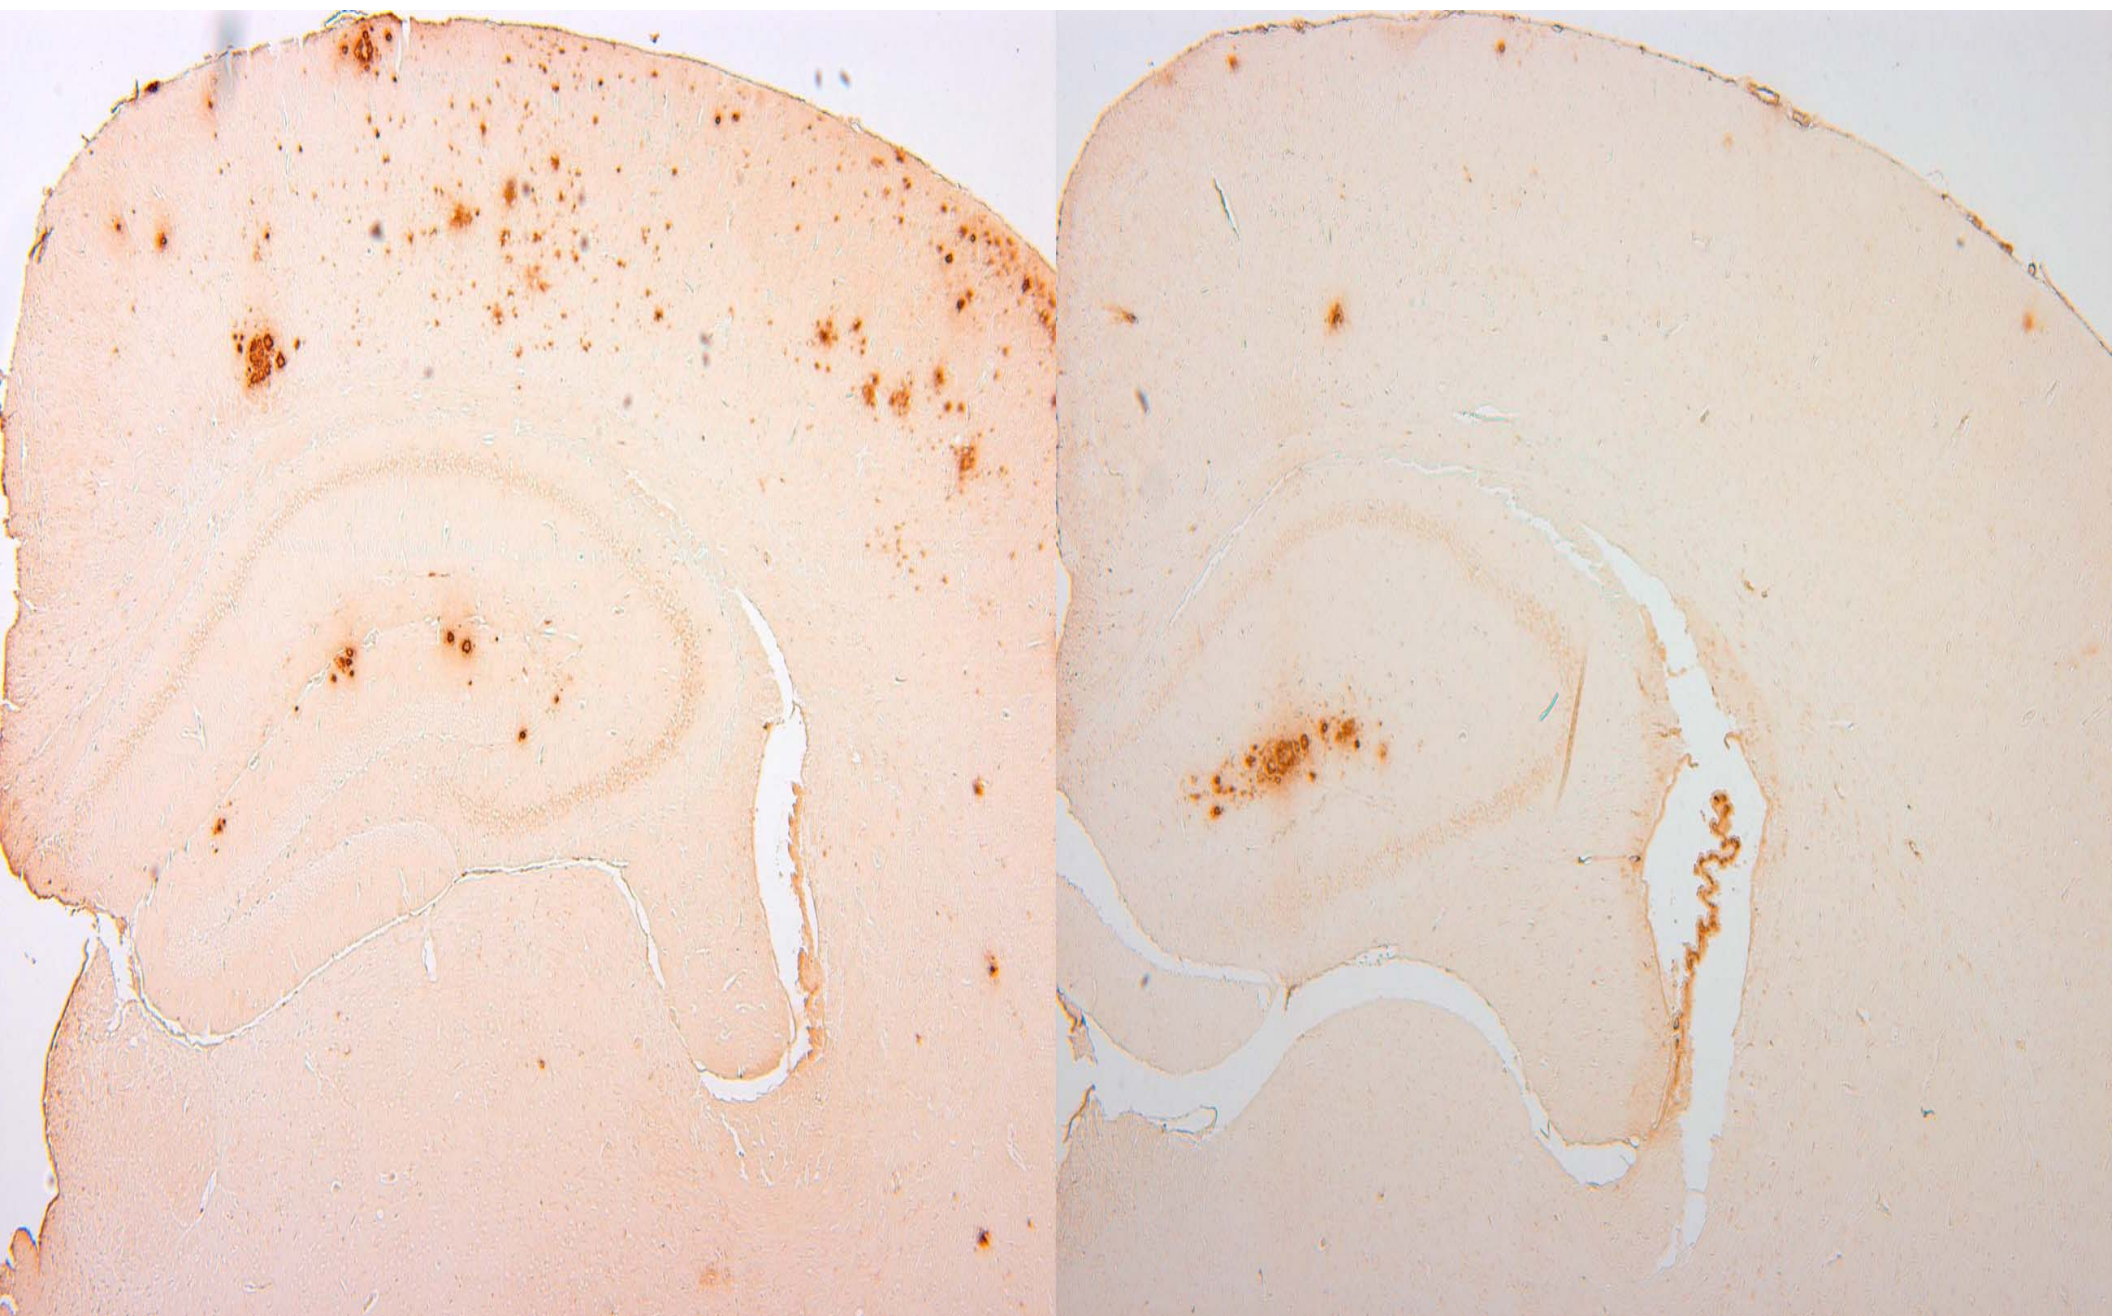

**Placebo**

**Indomethacin  
Vitamin E**

Supplement: MOESM6 [file 9600010]
